# Supplementary material for: ATF3 Repression of BCL-XL Determines Apoptotic Sensitivity to HDAC Inhibitors across Tumor Types
Source: Oxford University Press journal article supplement (doi:10.1158/1078-0432.ccr-17-0466), 2017-06-13
Supplement: 10780432ccr170466-sup-179193_2_supp_4073159_dqddbs.docx [file 10780432ccr170466-sup-179193_2_supp_4073159_dqddbs.docx]

**Supplementary Table 1: Primers used.**

**qRT-PCR Primers**

**Primer Name** **Sequence**

*c-FOS* Forward ATCAAGGGAAGCCACAGACA

*c-FOS* Reverse ATCAAGGGAAGCCACAGACA

*c-JUN* Forward TGACTGCAAAGATGGAAACG

*c-JUN* Reverse TGAGGAGGTCCGAGTTCTTG

*ATF3* Forward GTGCCGAAACAAGAAGAAGG

*ATF3* Reverse GTGCCGAAACAAGAAGAAGG

*EGR1* Forward ATCCCCGACTACCTGTTTCC

*EGR1* Reverse GTTTGATGAGCTGGGACTGG

*EGR3* Forward ATCTGTGGGGAGAAAGAGCA

*EGR3* Reverse ATGATGGTGGGAAGGAGAAA

*GADD45β* Forward ACCTGCATTGTCTCCTGGTC

*GADD45β* Reverse TGGCAGCAACTCAACAGATT

*Bcl2-L1 (Bcl-xL)* Forward CTGCTGCATTGTTCCCATAG

*Bcl2-L1 (Bcl-xL)* Reverse TTCAGTGACCTGACATCCCA

*Bcl2* Forward GAGAAATCAAACAGAGGCCG

*Bcl2* Reverse CTGAGTACCTGAACCGGCA

*Bcl2-L2 (Bcl-w)* Forward CGTCCCCGTATAGAGCTGTG

*Bcl2-L2 (Bcl-w)* Reverse GGACAAGTGCAGGAGTGGAT

*Mcl-1 (Bcl-w)* Forward CATTCCTGATGCCACCTTCT

*Mcl-1 (Bcl-w)* Reverse TCGTAAGGACAAAACGGGAC

*BIM* Forward TTGTCACAACTCATGGGTGC

*BIM* Reverse TCTGAGTGTGACCGAGAAGG

*BID* Forward CTCCGACTCACTCCTGGTTC

*BID* Reverse ACAAATACGAATGTGCAGCG

*BIK* Forward GTCATGCCAAGAACCTCCAT

*BIK* Reverse GGTGGCTTACAGACGCTGC

*BMF* Forward TTCAAAGCAAGGTTGTGCAG

*BMF* Reverse CCAGTTTCCCAGCAGTCTTG

*BAD* Forward GGTAGGAGCTGTGGCGACT

*BAD* Reverse CAAGCATCATCGCCAGG

*PUMA* Forward CTGGGTAAGGGCAGGAGTC

*PUMA* Reverse GACGACCTCAACGCACAGT

*NOXA* Forward AAGTTTCTGCCGGAAGTTCA

*NOXA* Reverse GCAAGAACGCTCAACCGAG

*HRK* Forward AACGGGAACCAGCTTTCTC

*HRK* Reverse CAGGCGGAACTTGTAGGAAC

*Bax* Forward AGCTTCTTGGTGGACGCAT

*Bax* Reverse CAGAGGCGGGGTTTCATC

*Bak* Forward CCGAAGCCATTTTTCAGGT

*Bak* Reverse GACCTCCATCTCCACCCTG

*PUMA* Forward CTGGGTAAGGGCAGGAGTC

*PUMA* Reverse GACGACCTCAACGCACAGT

*APAF1* Forward CCACTCAACAGCAAAGAGCA

*APAF1* Reverse ATGGAGAAGGGCAGCAAGA

*Caspase 9* Forward ACCCTGGACGACATCTTTGA

*Caspase 9* Reverse GAAGGCAGCACTCACCCTAA

*ACTB* Forward CACCTTCACCGTTCCAGTTT

*ACTB* Reverse GATGAGATTGGCATGGCTTT

MouseATF3 Forward GAGGATTTTGCTAACCTGACACC

MouseATF3 Reverse TTGACGGTAACTGACTCCAGC

**ChIP Primers**

**Primer Name** **Sequence Start End**

*BCL-XL F1* Forward AGAGCTCTTGCGTCTGGAA -954 -732

*BCL-XL F1* Reverse CCCCCTAGACCTTCCTGAGA -954 -732

*BCL-XL F2* Forward CCCTCCTCTCAGGAAGGTCT -757 -535

*BCL-XL F2* Reverse CAGCTGAGACCACGTTTTCC -757 -535

*BCL-XL F3* Forward CAGGAAAACGTGGTCTCAGC -556 -363

*BCL-XL F3* Reverse TTGCTCTGAATTCCCCAAAG -556 -363

*BCL-XL F4* Forward CTTTGGGGAATTCAGAGCAA -382 -219

*BCL-XL F4* Reverse GGACTTCTCAATGGGGTTCA -382 -219

*BCL-XL F5* Forward GAAACCTTGAACCCCATTGA -245 -85

*BCL-XL F5* Reverse GGCTCTCCGCCTCCTACT -245 -85

*BCL-XL F6* Forward TAGGAGGCGGAGAGCCAAG -100 -51

*BCL-XL F6* Reverse ACACAGGAATTGCGAAGCTC -100 -51

*BCL-XL 5UTR F1* Forward GAGCTTCGCAATTCCTGTGT 32 181

*BCL-XL 5UTR F1* Reverse GTATCACAGGTCGGGAGAGG 32 181

*BCL-XL Up-2kb F1* Forward CGTGGTGGTGTGTACCTGTA -2151 -1937

*BCL-XL Up-2kb F1* Reverse ACCCCTTTTTCAGGTGGTCT -2151 -1937
